# Supplementary material for: Water Deficit Severity during the Preceding Year Determines Plant Tolerance to Subsequent Year Drought Stress Challenges: A Case Study in Damask Rose
Source: MDPI journal article supplement (doi:10.3390/horticulturae10050462), 2024-05-01
Supplement: s1 [file s1]

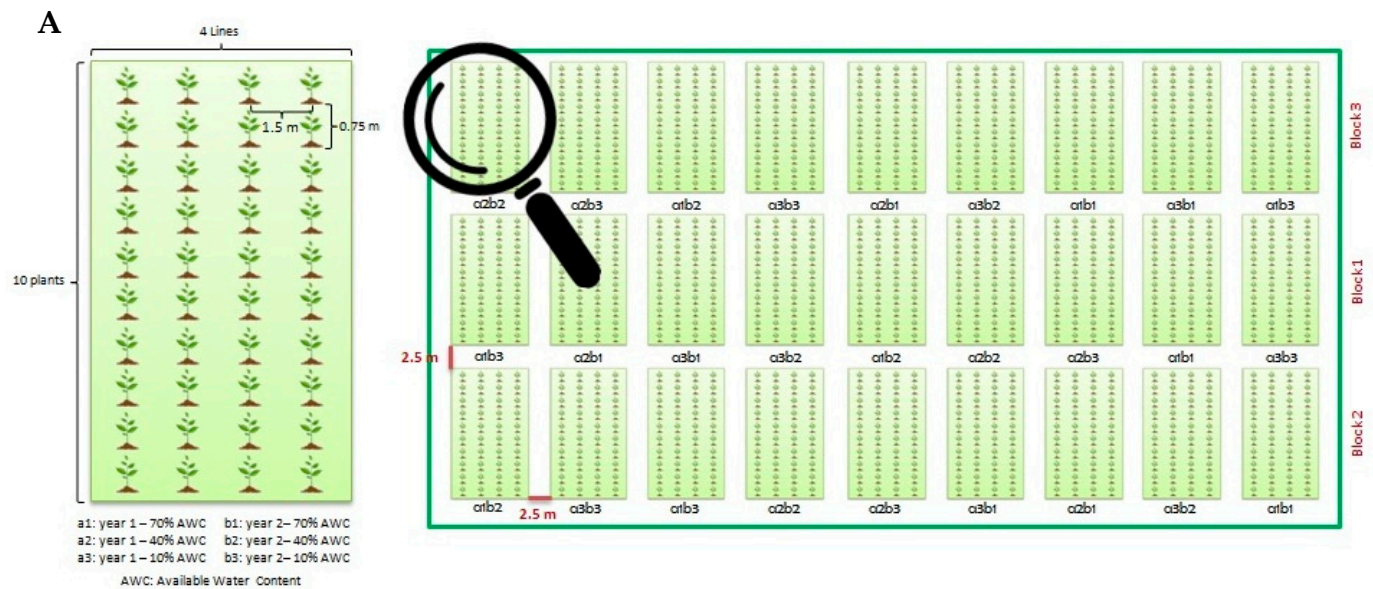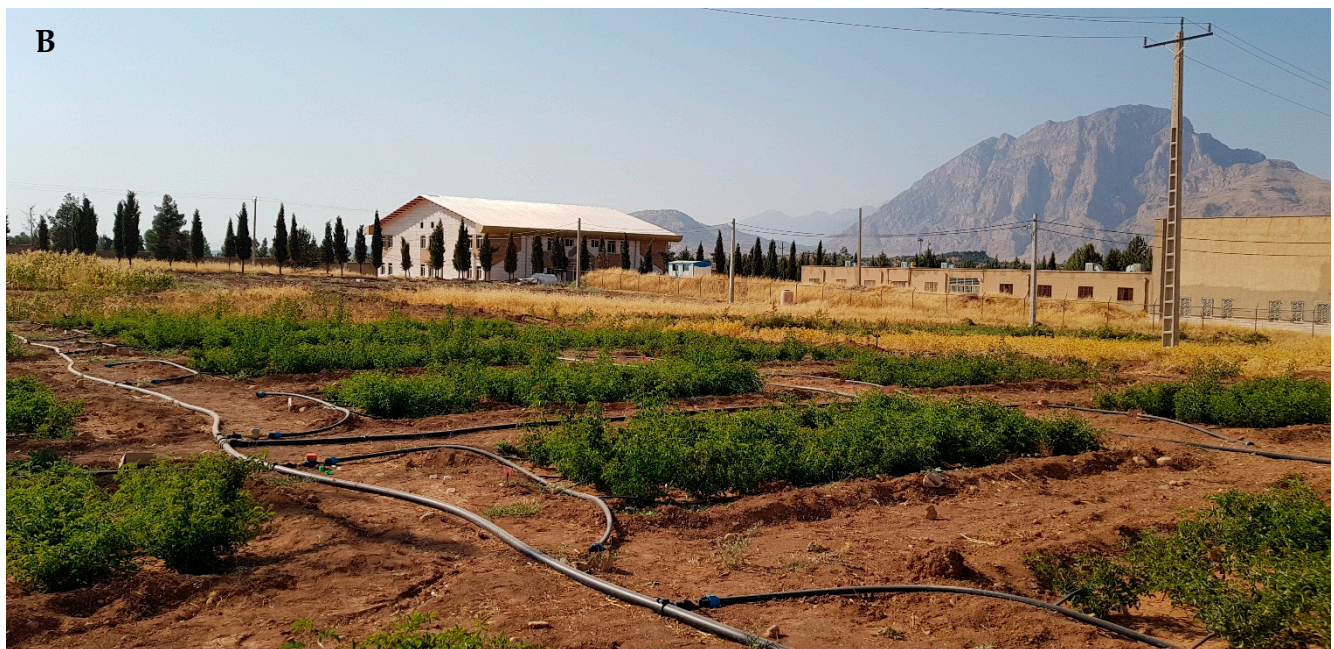

**Figure S1.** The experimental layout (A), and field (B), where this study was conducted. Each plot contained four lines of 10 plants. At each plot, measurements were performed on three randomly selected plants situated at lines 2 and 3. In each plant, three separate measurements were obtained. The average of these nine measurements per plot was further treated as a single replication. For taking observations, three plots were analyzed.

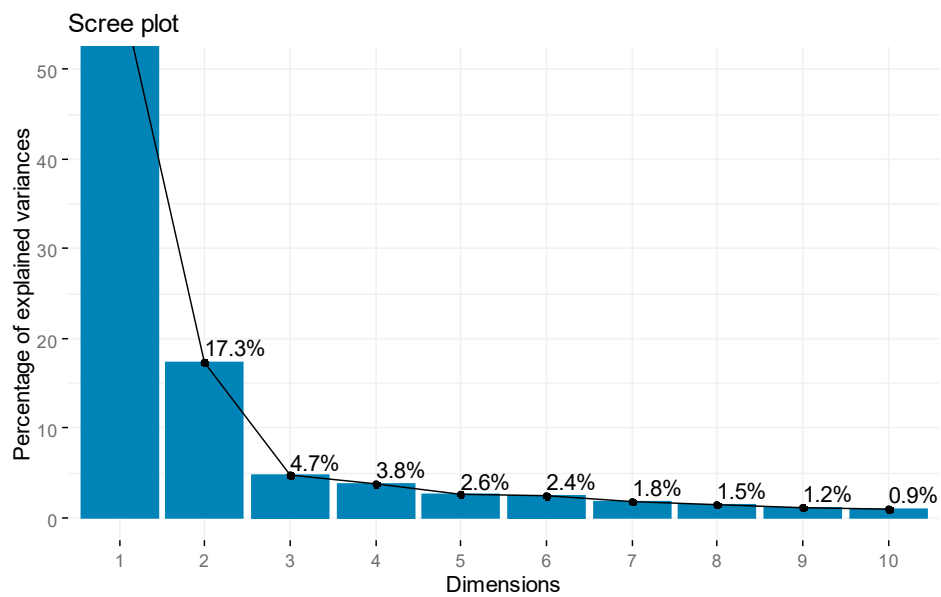

**Figure S2.** Ten major components along with the proportions of ascribed variance. The principal component analysis biplot (which accounts for 76.6% of the cumulative percentage explained) was created using the first two eigenvalues.
